# Supplementary material
Source: Springer Nature journal article supplement (https://www.springermedizin.de/resource/supplementary/13041_2009_52_MOESM6_ESM.pdf/25657418)

**A**

Control

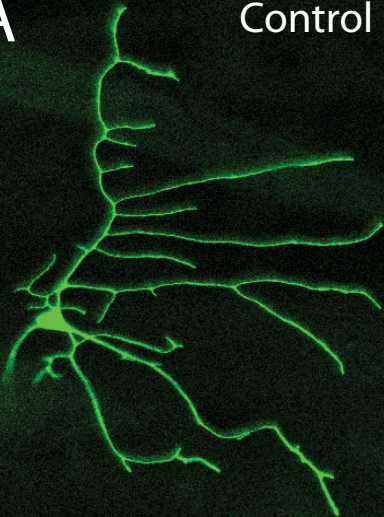**B***dTDP-43*<sup>Q367X</sup>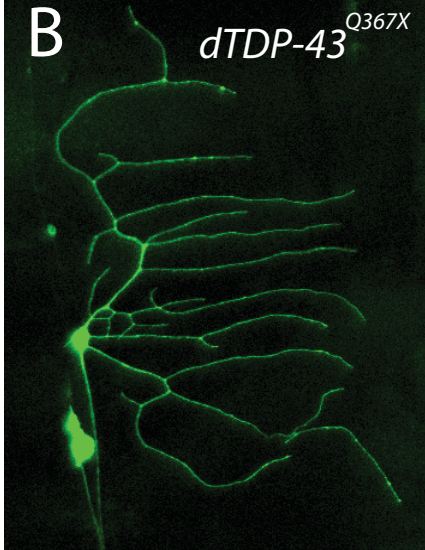**C**

Number of Dendritic Ends

30

20

10

0

WT

-/-

6

6

\*\*\*

Supplement: MOESM6 [file 25657418]
